# Supplementary material for: Prevalence of Functional Gastrointestinal Disorders (Rome IV Criteria) among a Cohort of New Zealand Children
Source: MDPI journal article supplement (doi:10.3390/gidisord5020021), 2023-06-09
Supplement: s1 [file s1]

*Table S1. Association between individual FGID categories and independent variables among children in NZ.*

NS = not significant at a level  $p < 0.05$ , CV = cyclic vomiting, FN = functional nausea, FV = functional vomiting, RS = rumination syndrome, FD = functional dyspepsia, IBS = irritable bowel syndrome, AM = abdominal migraine, AP NOS = abdominal pain not otherwise specified, FC = functional constipation.

| Variable                   | CV | FN | FV | RS | FD           | IBS          | AM           | AP NOS | FC           |
|----------------------------|----|----|----|----|--------------|--------------|--------------|--------|--------------|
| Age                        | NS | NS | NS | NS | NS           | NS           | NS           | NS     | NS           |
| Sex                        | NS | NS | NS | NS | NS           | NS           | NS           | NS     | NS           |
| Ethnicity: NZ European     | NS | NS | NS | NS | NS           | NS           | NS           | NS     | NS           |
| Ethnicity: Māori           | NS | NS | NS | NS | NS           | NS           | NS           | NS     | <b>0.009</b> |
| Ethnicity: Pacific Islands | NS | NS | NS | NS | NS           | NS           | NS           | NS     | NS           |
| Ethnicity: Asian           | NS | NS | NS | NS | NS           | NS           | NS           | NS     | NS           |
| Ethnicity: MELAA           | NS | NS | NS | NS | NS           | NS           | NS           | NS     | NS           |
| Ethnicity: Other           | NS | NS | NS | NS | NS           | NS           | NS           | NS     | NS           |
| Household income           | NS | NS | NS | NS | NS           | NS           | NS           | NS     | NS           |
| Parent education           | NS | NS | NS | NS | NS           | NS           | NS           | NS     | NS           |
| Urban/rural living         | NS | NS | NS | NS | NS           | NS           | NS           | NS     | NS           |
| Chronic health condition   | NS | NS | NS | NS | NS           | NS           | NS           | NS     | NS           |
| On medications             | NS | NS | NS | NS | NS           | NS           | <b>0.043</b> | NS     | NS           |
| Allergies                  | NS | NS | NS | NS | <b>0.020</b> | NS           | NS           | NS     | NS           |
| Parent has FGID (All IBS)  | NS | NS | NS | NS | <b>0.020</b> | <b>0.011</b> | NS           | NS     | NS           |
